# Supplementary material for: Regional Diets Targeting Gut Microbial Dynamics to Support Prolonged Healthspan
Source: PubMed Central journal article supplement (PMC8116520; doi:10.3389/fmicb.2021.659465), 2021-04-29
Supplement: Table_1.pdf [file Table_1.pdf]

**Supplementary Table 1. Review of publications reporting regional and dietary associations with the gut/faecal microbiome in elderly and centenarian populations.**

| Geography                            | Cohort details                                                                                                                         | Findings                                                                                                                                                                                                                                                                                                                                                                                                                                                                                                                                                                                                                                                                                                                                                                                                                                                                                                                                                                                                                                                                                                                                                                                                 | Diet characteristics or identified clusters                                                                                                                                                                                                                                                                                                                                                                                                                                                                                                                            | References                                           |
|--------------------------------------|----------------------------------------------------------------------------------------------------------------------------------------|----------------------------------------------------------------------------------------------------------------------------------------------------------------------------------------------------------------------------------------------------------------------------------------------------------------------------------------------------------------------------------------------------------------------------------------------------------------------------------------------------------------------------------------------------------------------------------------------------------------------------------------------------------------------------------------------------------------------------------------------------------------------------------------------------------------------------------------------------------------------------------------------------------------------------------------------------------------------------------------------------------------------------------------------------------------------------------------------------------------------------------------------------------------------------------------------------------|------------------------------------------------------------------------------------------------------------------------------------------------------------------------------------------------------------------------------------------------------------------------------------------------------------------------------------------------------------------------------------------------------------------------------------------------------------------------------------------------------------------------------------------------------------------------|------------------------------------------------------|
| Cork city and county region, Ireland | ELDERMET Cohort, 178 Caucasians (64-102 years old)                                                                                     | <ul style="list-style-type: none"> <li>• Long-term residential care residents had ↑ <i>Bacteroidetes</i> (phylum level); <i>Parabacteroides</i>, <i>Eubacterium</i>, <i>Anaerotruncus</i>, <i>Lactonifactor</i> and <i>Coprobacillus</i> (genus level).</li> <li>• Community-dwelling residents had ↑ <i>Firmicutes</i> (phylum level); <i>Coprococcus</i>, and <i>Roseburia</i> (genus level).</li> <li>• <i>Clostridiales</i> was associated with frailty and malnutrition.</li> <li>• <i>Bacteroides</i> was associated with diets rich in animal produces, and low in fruits and vegetables.</li> <li>• Ageing was accompanied by lower consumption and variety of fiber intake → reduced microbiota diversity → detrimental to gut health.</li> </ul>                                                                                                                                                                                                                                                                                                                                                                                                                                               | <ul style="list-style-type: none"> <li>• Dietary patterns in community location correlate with microbial composition differences.</li> <li>• Dietary groups (DG) can be clustered into: <ul style="list-style-type: none"> <li>- DG1: complex carbohydrates (CHO), fruits and vegetables daily, protein-rich white meat/fish/eggs 5 times/week, dairy 3 times/week.</li> <li>- DG2: complex and simple CHO, red meat/fish/eggs daily, fruits and vegetables 2-3 times/week, dairy produce once/week.</li> <li>- DG3: least variety, simple CHO.</li> </ul> </li> </ul> | (Claesson et al., 2012; Wu et al., 2019)             |
| Emilia Romagna, Italy                | Semi-supercentenarians (105-109 years old), centenarians (99-104 years old), 13 elderly (65-75 years old), 11 adults (22-48 years old) | <ul style="list-style-type: none"> <li>• Ageing was associated with: <ul style="list-style-type: none"> <li>- ↑ abundance of <i>Christensenellaceae</i> (family level); <i>Akkermansia</i>, <i>Methanobrevibacter</i>, <i>Bifidobacterium</i> and <i>Oscillospira</i> (genus level).</li> <li>- ↓ <i>Ruminocoacea</i>, <i>Coprococcus</i> and <i>Roseburia</i> (genus level); <i>Bifidobacterium adolescentis</i>, <i>Bifido- bacterium longum</i>, <i>Bacteroides uniformis</i>, <i>Faecalibacterium prausnitzii</i>, <i>Ruminococcus bromii</i>, <i>Subdoligranulum</i> sp., <i>Anaerostipes hadrus</i>, <i>Blautia obeum</i>, <i>Ruminococcus torques</i>, <i>Coprococcus catus</i>, <i>Coprococcus comes</i>, <i>Dorea longicatena</i>, and <i>Roseburia</i> sp (species level).</li> </ul> </li> <li>• A progressive age-related ↑ in number of reads for genes devoted to xenobiotic biodegradation and metabolism, and ↓ in CAZymes genes involved in CHO metabolism.</li> <li>• Age-related differences in lipid metabolism (α-linoleic acid, glycerolipid), lipopolysaccharide biosynthesis and certain amino acid metabolism (tryptophan, tyrosine, glycine, serine and threonine).</li> </ul> | <ul style="list-style-type: none"> <li>• Diet is characterised by pasta, bread, meat, salami, fish, wild fruits and vegetables, olives, cheese and generous seasonings.</li> </ul>                                                                                                                                                                                                                                                                                                                                                                                     | (Biagi et al., 2016; Rampelli et al., 2020; Zicasso) |
| Sardinia, Italy                      | 19 centenarians (99-107 years old), 23 elderly (68-88 years old), 17 adults (21-33 years old)                                          | <ul style="list-style-type: none"> <li>• ↑ diversity of core species and microbial genes in centenarians than in elderly and adults.</li> <li>• ↑ <i>Pyramidobacter</i>, <i>Desulfovibrio</i> (genus level); <i>Methanobrevibacter smithii</i>, <i>Bifidobacterium adolescentis</i> (species level) and ↓ <i>Ruminococcus</i>, <i>Corprococcus</i>, <i>Dorea</i></li> </ul>                                                                                                                                                                                                                                                                                                                                                                                                                                                                                                                                                                                                                                                                                                                                                                                                                              | <ul style="list-style-type: none"> <li>• Mediterranean-style plant-based diet comprising of fruits, vegetables, legumes, nuts, olive oil, whole wheat bread, moderate consumption of red wine (e.g., cannonau), goat's milk, yoghurt (e.g., goiddu) and low consumption of animal-based foods.</li> </ul>                                                                                                                                                                                                                                                              | (Barbagallo et al., 2002; Wu et al., 2019)           |

|                                                               |                                                                                                                  |                                                                                                                                                                                                                                                                                                                                                                                                                                                                                                                                                                                                                                                                                     |                                                                                                                                                                                                                                                                                                                                                                                                                                                                                                                                                                                           |                                         |
|---------------------------------------------------------------|------------------------------------------------------------------------------------------------------------------|-------------------------------------------------------------------------------------------------------------------------------------------------------------------------------------------------------------------------------------------------------------------------------------------------------------------------------------------------------------------------------------------------------------------------------------------------------------------------------------------------------------------------------------------------------------------------------------------------------------------------------------------------------------------------------------|-------------------------------------------------------------------------------------------------------------------------------------------------------------------------------------------------------------------------------------------------------------------------------------------------------------------------------------------------------------------------------------------------------------------------------------------------------------------------------------------------------------------------------------------------------------------------------------------|-----------------------------------------|
|                                                               |                                                                                                                  | <p>(genus level); <i>Faecalibacterium prausnitzii</i>, <i>Eubacterium rectale</i> (species level) in centenarians.</p> <ul style="list-style-type: none"> <li>Gut microbiota was correlated with host functional independence in centenarians: <ul style="list-style-type: none"> <li>High capacity for central metabolism (glycolysis and fermentation to SCFAs) but low in gene-encoding enzymes involved in CHO degradation.</li> </ul> </li> </ul>                                                                                                                                                                                                                              |                                                                                                                                                                                                                                                                                                                                                                                                                                                                                                                                                                                           |                                         |
| Asturias region, Spain                                        | 49 adults (<50 years old), 58 adults (50-65 years old), 19 elderly (66-80 years old), 27 elderly (>80 years old) | <ul style="list-style-type: none"> <li>↑ <i>Akkermansia</i> and <i>Lactobacillus</i> (genus level) in &gt;80 years old.</li> <li>↓ in <i>Bifidobacterium</i>, <i>Faecalibacterium</i>, <i>Bacteroides</i> and <i>Clostridium</i> cluster XIVa (genus level) with age.</li> <li>Ageing was associated with ↓ faecal SCFA.</li> <li>Levels of <i>Bacteroides</i> ↓ correlated with intake of polyunsaturated fatty acids but ↑ with vitamins B<sub>6</sub> and C.</li> <li>Levels of <i>Bacteroides</i> and <i>Clostridium</i> cluster XIVa ↑ correlated with intake of polyphenols.</li> <li>Levels of <i>Lactobacillus</i> ↓ correlated with intake of vitamins A and D.</li> </ul> | <ul style="list-style-type: none"> <li>Asturian diet is characterised by fresh fish, cheese, beans, cider and red wine.</li> <li>Variable energy intake observed with age: <ul style="list-style-type: none"> <li>&lt;50 years old: 19 kcal/day</li> <li>50-65 years old: 2033 kcal/day</li> <li>66-80 years old: 1624 kcal/day</li> <li>&gt;80 years old: 1728 kcal/day</li> </ul> </li> <li>Elderly &gt;80 years old have ↑ intake of saturated and polyunsaturated fatty acids, but ↓ intakes of carotenes, folic acid, polyphenols and vitamins A, C, D and B<sub>6</sub>.</li> </ul> | (Salazar et al., 2019)                  |
| Sichuan, China                                                | 168 Chinese, elderly (>90 years old) compared to elderly and adults                                              | <ul style="list-style-type: none"> <li>In long-living individuals, ↑ community richness (Chao index) and diversity (Shannon index), as well as ↑ abundance of and <i>Erysipelotrichaceae</i> (family level); <i>Akkermansia</i>, <i>Ruminococcus</i>, <i>Christensenella</i>, <i>Clostridium</i> XIVa, <i>Blautia</i> members, <i>Faecalibacterium</i> (genus level).</li> </ul>                                                                                                                                                                                                                                                                                                    | <ul style="list-style-type: none"> <li>Common foods consumed include wild game, seafood, fresh vegetables, bamboo shoots, mushrooms and fungus.</li> <li>Diverse variety of fine-textured fermented and cultivated condiments: Zigong well salt, Neijiang white sugar, Langzhong Baoning vinegar, Deyang soy sauce, Pixian bean paste, Maowen and Chengdu pepper, Xufu sprouts and Nanchong Dongcai.</li> </ul>                                                                                                                                                                           | (Kong et al., 2016; Zhang and Ma, 2020) |
| Zhenjiang, Suzhou and Nantong cities, Jiangsu Province, China | >1000 healthy Chinese (3-100 years old)                                                                          | <ul style="list-style-type: none"> <li>In older individuals, ↑ in <i>Dorea</i>, <i>Clostridium insertae sedis and sensu strictu 1</i> and <i>Marvinbryantia</i> (genus level) and to a lesser extent, members of <i>Prevotella</i> genus.</li> <li>Older individuals microbiome revealed little difference to younger individuals, likely as they were exceptionally healthy, lived in a single region and ate a very similar diet.</li> <li>Clear regional difference, where members of <i>Faecalibacterium</i> genus form core microbiota in this population.</li> </ul>                                                                                                          | <ul style="list-style-type: none"> <li>Diet is characterised by varied consumption of seafood (e.g., catfish, crab, sturgeon, long-tailed anchovy).</li> <li>Common specialty dishes in Jiangsu province include watermelon chicken, sweet and sour mandarin fish.</li> <li>Predominant vegetables include Xianghu water shield, Huaian cattail, Baoying lotus, Chinese chestnut, gorgon fruit, <i>Zizania</i> aquatic, winter bamboo shoots and water chestnut.</li> </ul>                                                                                                               | (Bian et al., 2017; Zhang and Ma, 2020) |
| Chengmai, Danzhou and Lingao districts, Hainan, China         | China Hainan Centenarian Cohort, 75 centenarians (96-110 years old)                                              | <ul style="list-style-type: none"> <li>Significant ↓ in <i>Akkermansia muciniphila</i>, <i>Alistipes finegoldii</i>, <i>Alistipes shahii</i>, <i>Bacteroides faecis</i>, <i>Bacteroides intestinalis</i>, <i>Butyrivibrio crossotus</i>, <i>Bacteroides stercoris</i>, and <i>Prevotella stercorea</i> (species level).</li> <li>↑ in <i>Bifidobacterium longum</i> and <i>Ruminococcus bromii</i> (species level) before death.</li> </ul>                                                                                                                                                                                                                                         | <ul style="list-style-type: none"> <li>Minimally-processed diet rich in fruits, wild vegetables, grain-based products (noodles, congee, bun) and meat (mainly pork) with cooking methods being mostly boiled or mild seasoning.</li> <li>Proportion of fats in dietary structure is slightly higher (33%) than MedDiet.</li> </ul>                                                                                                                                                                                                                                                        | (Luan et al., 2020)                     |

|                                                  |                                                                                                                       |                                                                                                                                                                                                                                                                                                                                                                                                                                                                                                                                                                                                                                                                                                                                                                                                                                                                                                                                                                                                                  |                                                                                                                                                                                                                                                                                                                                                                                                                                                                                                                                                |                                                                                                        |
|--------------------------------------------------|-----------------------------------------------------------------------------------------------------------------------|------------------------------------------------------------------------------------------------------------------------------------------------------------------------------------------------------------------------------------------------------------------------------------------------------------------------------------------------------------------------------------------------------------------------------------------------------------------------------------------------------------------------------------------------------------------------------------------------------------------------------------------------------------------------------------------------------------------------------------------------------------------------------------------------------------------------------------------------------------------------------------------------------------------------------------------------------------------------------------------------------------------|------------------------------------------------------------------------------------------------------------------------------------------------------------------------------------------------------------------------------------------------------------------------------------------------------------------------------------------------------------------------------------------------------------------------------------------------------------------------------------------------------------------------------------------------|--------------------------------------------------------------------------------------------------------|
|                                                  |                                                                                                                       |                                                                                                                                                                                                                                                                                                                                                                                                                                                                                                                                                                                                                                                                                                                                                                                                                                                                                                                                                                                                                  | <ul style="list-style-type: none"> <li>Averaged total food intake = 1,040 kcal/day.</li> <li>CHO contribute ~50% of total energy intake, lower than that of Italians and Asian immigrants in North Italy.</li> </ul>                                                                                                                                                                                                                                                                                                                           |                                                                                                        |
| Bama county and Nanning city, Guangxi, China     | Centenarians (100-108 years old), elderly (85-99 years old) in Bama county, elderly (80-92 years old) in Nanning city | <ul style="list-style-type: none"> <li>↑ abundance in <i>Roseburia</i> and <i>Escherichia</i> (genus level),</li> <li>↓ in <i>Lactobacillus</i>, <i>Faecalibacterium</i>, <i>Parabacteroides</i>, <i>Butyrivimonas</i>, <i>Coprococcus</i>, <i>Megamonas</i>, <i>Mitsuokella</i>, <i>Sutterella</i> and <i>Akkermansia</i> (genus level) in these centenarians.</li> <li>Diet-related OTUs were classified as <i>Bacteroidales</i> (order level) and <i>Lachnospiraceae</i> (family level) (↓ in high-fiber diet) and <i>Ruminococcaceae</i> (family level) (↑ in high-fiber diet).</li> </ul>                                                                                                                                                                                                                                                                                                                                                                                                                   | <ul style="list-style-type: none"> <li>Bama diets are characterised as low-fat, low-calorie, high in vitamins and fibre (hemp, corn, brown rice and millet).</li> <li>Plant-based diet including pumpkin, tomatoes, amaranth leaves, peppers, sweet potatoes and their leaves, pak choi, mushrooms, bamboo shoots, peppers, soybean and tofu, lima beans and mung beans.</li> <li>Small quantities lean meat-based products are consumed (pork, goat meat, chicken and duck).</li> <li>Averaged total food intake = 1,500 kcal/day.</li> </ul> | (Fang et al., 2015)                                                                                    |
| Wakayama and Osaka, Japan                        | 367 community-dwelling Japanese (0-104 years old)                                                                     | <ul style="list-style-type: none"> <li>↑ abundance in <i>Bacteroidetes</i> and <i>Proteobacteria</i> (phylum level), and ↓ <i>Firmicutes</i> (phylum level) in centenarians compared to younger adults and elderly.</li> <li>↑ in microbial diversity with ageing until the centenarian stage.</li> <li>Certain oral bacteria (<i>Porphyromonas</i>, <i>Treponema</i>, <i>Fusobacterium</i> and <i>Pseudoramibacter</i> (genus level)), which have difficulty reaching the intestinal tract due to barriers such as gastric juice and bile acid, were enriched in elderly-associated co-abundance groups. Decline in gastrointestinal tract functionality in elderly may lead to compositional changes in gut microbiota.</li> <li>Dietary polyphenols such as catechins found in green tea is found to significantly ↑ <i>Bifidobacterium</i> and <i>Lactobacillus</i> (genus level).</li> <li>↑ <i>Bifidobacterium</i> can also be attributed to the Japanese diet rich in fermented food products.</li> </ul> | <ul style="list-style-type: none"> <li>Located on the coast, these cities have a high consumption of seafood in addition to the typical Japanese diet consisting of short-grain rice, seaweed, green tea, and fermented food products.</li> <li>Other speciality dishes or ingredients include sansho pepper, soy sauce, and salt-pickled ume plum.</li> <li>Some individuals consume a Buddhist-vegetarian cuisine (Shojin-ryori) made of vegetables and wild plants.</li> </ul>                                                              | (Odamaki et al., 2016; Unno and Osakabe, 2018; Tourism Exchange Division of Wakayama Prefecture, 2020) |
| Kyotango and Kyoto city, Kyoto Prefecture, Japan | 51 centenarians from Kyotango (recognised as a longevity village), 51 centenarians from Kyoto, (65-80 years old)      | <ul style="list-style-type: none"> <li>β-diversity of faecal microbiome was significantly different between regions.</li> <li>With urbanisation, ↑ in <i>Proteobacteria</i> and <i>Bacteroides</i> (phylum level); <i>Oscillospira</i>, <i>Parabacteroides</i> and <i>Ruminococcus</i> (genus level), but ↓ abundance in <i>Firmicutes</i> (phylum level); <i>Roseburia</i> and <i>Coprococcus</i> (genus level).</li> <li>Liposaccharide biosynthesis proteins and pathway were markedly ↑ with urbanisation, and ↓ transporters pathway and ABC transporters.</li> </ul>                                                                                                                                                                                                                                                                                                                                                                                                                                       | <ul style="list-style-type: none"> <li>Diet is characterised by dishes and ingredients such as porridge with red beans, longevity bento (sticky rice, preserved mackerel, beans) and soybeans (Yudofu).</li> <li>A common phrase to the region is to only “eat until you are 80% full”.</li> </ul>                                                                                                                                                                                                                                             | (Fukkoshi et al., 2015; Naito et al., 2019)                                                            |

|                                                                                  |                                                                                                                                               |                                                                                                                                                                                                                                                                                                                                                                                                                                                                                                                                                                                                                                                                                                                                                                                       |                                                                                                                                                                                                                                                                                                                                                                                                                                                                                                                                                                                                                                                                                                                                                                                                              |                                             |
|----------------------------------------------------------------------------------|-----------------------------------------------------------------------------------------------------------------------------------------------|---------------------------------------------------------------------------------------------------------------------------------------------------------------------------------------------------------------------------------------------------------------------------------------------------------------------------------------------------------------------------------------------------------------------------------------------------------------------------------------------------------------------------------------------------------------------------------------------------------------------------------------------------------------------------------------------------------------------------------------------------------------------------------------|--------------------------------------------------------------------------------------------------------------------------------------------------------------------------------------------------------------------------------------------------------------------------------------------------------------------------------------------------------------------------------------------------------------------------------------------------------------------------------------------------------------------------------------------------------------------------------------------------------------------------------------------------------------------------------------------------------------------------------------------------------------------------------------------------------------|---------------------------------------------|
| Gurye, Gokseong, Sunchang and Damyang counties, Southwestern part of South Korea | 30 centenarians (95-108 years old), 17 elderly (67-79 years old), 9 adults (26-43 years old) in longevity villages compared to urbanised town | <ul style="list-style-type: none"> <li>No difference in Shannon diversity index between longevity villages and urbanised town.</li> <li>But more diverse phyla in centenarians faecal microbiome compared to elderly and adults such as <i>Verrucomicrobiota</i>, <i>Proteobacteria</i> and <i>Actinobacteria</i> (phylum level).</li> <li>↑ proportion of <i>Escherichia</i> and abundance of <i>Akkermansia</i> and <i>Clostridium</i> (genus level), but ↓ abundance in <i>Faecalibacterium</i> and <i>Prevotella</i> (genus level).</li> <li>Microbial metabolic pathways (phosphatidylinositol signalling system, glycosphingolipid biosynthesis, and various N-glycan biosynthesis) were predicted to be ↑, and may be associated with immune status and gut health.</li> </ul> | <ul style="list-style-type: none"> <li>Korean cuisine is typically characterised by a high soybean-based diet including fermented soybean paste (e.g., gochujang, doenjang and cheonggukjang) as well as short-grain rice and kimchi.</li> <li>Seasonal wild plants and herbs are also frequently consumed (acorns, pine, <i>Zanthoxylum piperitum</i>, bamboo seeds, arrowroot starch, mugwort, sedum, shepherd's purse, sowthistle, aster scaber, <i>Hemerocallis fulva</i>, <i>Ligularia stenocophala</i>, <i>Viola mandshurica</i>, chard, mallow, dandelion, mulberry leaves, Japanese ginger, aster romena, royal fern and <i>Scilla scilloides</i>).</li> <li>Egg consumption was lower in centenarians, but other protein-rich food was similar amongst centenarians, elderly and adults.</li> </ul> | (Lee and Moon, 2013; Bong-Soo et al., 2019) |
| Chandel, Senapati district of Manipur, and Imphal West district, India           | 30 centenarians, 60 adults                                                                                                                    | <ul style="list-style-type: none"> <li>Dominance of <i>Erysipelotrichaceae</i> (family level) in gut microbiota of Indian population.</li> <li>↑ <i>Ruminococcaceae</i>, <i>Rikenellaceae</i> and <i>Porphyromonadaceae</i> (family level); <i>Akkermansia</i>, <i>Alistipes</i>, <i>Pyramidobacter</i> (genus level) and ↓ <i>Faecalibacterium</i> (genus level); <i>Prevotellaceae</i> (family level) were associated with longevity in Indian centenarians.</li> <li>Increase in <i>Ruminococcaceae</i> diversity may be related to higher metabolic plasticity and versatility of gut microbiome.</li> </ul>                                                                                                                                                                      | <ul style="list-style-type: none"> <li>Rural endogamous population of Naga tribes in Chandel and Senapati districts typically consume two meals/day consisting of rice and heavy meat (mainly pork and beef), and frequent consumption of rice-based fermented beverages (e.g., rice wine).</li> <li>In comparison, dietary pattern of sub-urban Imphal West district is composed of fish-eating vegetarians.</li> </ul>                                                                                                                                                                                                                                                                                                                                                                                     | (Tuikhar et al., 2019)                      |
