# Supplementary material for: Regional Diets Targeting Gut Microbial Dynamics to Support Prolonged Healthspan
Source: PubMed Central journal article supplement (PMC8116520; doi:10.3389/fmicb.2021.659465), 2021-04-29
Supplement: Table_2.pdf [file Table_2.pdf]

**Supplementary Table 2: Summary of dietary characteristics (specific foods or complex diets) and their gut microbiome-associated trends observed with individual and/or clustered biological responses specific to geography, culture, and population.**

| Dietary components                                                                                   | Description of region/population and nutritional components                                                                                                                                                                                                                                                                                                                                                                                                                                                                                                                                                                                                                                                                                                                                                                                                                                                                                                                                                                                                                                                                                                                                                                                                      | Microbiota-associated trends                                                                                                                                                                                                                                                                                                                                                                                                                                                                                                                                                                                                                                                                                                                                                                                                                                                                                                                                                                                                                                                                                                                                                                                                                                                                                                                                                                                           | References                                                                                                            |
|------------------------------------------------------------------------------------------------------|------------------------------------------------------------------------------------------------------------------------------------------------------------------------------------------------------------------------------------------------------------------------------------------------------------------------------------------------------------------------------------------------------------------------------------------------------------------------------------------------------------------------------------------------------------------------------------------------------------------------------------------------------------------------------------------------------------------------------------------------------------------------------------------------------------------------------------------------------------------------------------------------------------------------------------------------------------------------------------------------------------------------------------------------------------------------------------------------------------------------------------------------------------------------------------------------------------------------------------------------------------------|------------------------------------------------------------------------------------------------------------------------------------------------------------------------------------------------------------------------------------------------------------------------------------------------------------------------------------------------------------------------------------------------------------------------------------------------------------------------------------------------------------------------------------------------------------------------------------------------------------------------------------------------------------------------------------------------------------------------------------------------------------------------------------------------------------------------------------------------------------------------------------------------------------------------------------------------------------------------------------------------------------------------------------------------------------------------------------------------------------------------------------------------------------------------------------------------------------------------------------------------------------------------------------------------------------------------------------------------------------------------------------------------------------------------|-----------------------------------------------------------------------------------------------------------------------|
| Soy and soy-products                                                                                 | <ul style="list-style-type: none"> <li>• Isoflavones are a major component of Asian diets (15-50 mg/day) compared to Western diets (&lt;2 mg/day).</li> <li>• Ability to produce equol is highly variable within and between populations.</li> <li>• 59% equol-producers amongst vegetarians compared to 25% amongst non-vegetarians (American population).</li> <li>• 51% equol-producers in Korean-American women compared to 36% in non-Korean-American women.</li> </ul>                                                                                                                                                                                                                                                                                                                                                                                                                                                                                                                                                                                                                                                                                                                                                                                     | <ul style="list-style-type: none"> <li>• Equol, a microbial metabolite of daidzein, is produced by some strains of <i>Adlercreutzia</i>, <i>Eggerthella</i>, <i>Slackia</i>, <i>Pediococcus</i>, <i>Lactococcus</i>, <i>Bifidobacterium</i>, and <i>Clostridium</i> (genus level) through reduction, de-/methylation, di-/hydroxylation, and C-ring cleavage reactions.</li> <li>• Most isolated equol-producing microbes belong to <i>Coriobacteriaceae</i> (family level), where members of this family are involved in catabolism of cholesterol-derived compounds, hinting at their functional specialisation in the gut.</li> <li>• Presence of isoflavones in diet does not select for equol-producing bacteria.</li> <li>• Genes involved in equol production are present in both equol- and non-equol producers.</li> <li>• In non-equol producers, daidzein is converted into <i>O</i>-desmethylangolensin (<i>O</i>-DMA).</li> </ul>                                                                                                                                                                                                                                                                                                                                                                                                                                                                         | (Rafii, 2015; Meyer and Bennett, 2016; Vázquez et al., 2017; Mayo et al., 2019)                                       |
| Wholegrain cereals (wheat, rye, oat and barley) including complex carbohydrates and resistant starch | <ul style="list-style-type: none"> <li>• Wholegrain wheat and rye products are commonly consumed in German, Nordic, Russian and Australian populations, in contrast to highly refined grain products typically sold and consumed in Asian countries.</li> <li>• Lignans, enoxazinoids and alkylresorcinols are found in wholegrain wheat and rye products.</li> <li>• Odd-numbered plasma alkylresorcinols are established as food-intake biomarkers that reflect medium- to long-term wholegrain consumption in populations with stable and frequent consumption.</li> <li>• Avenanthramides (AVAs) and steroidal saponins are uniquely found in oats.</li> <li>• (Soluble) fibres such as <math>\beta</math>-glucan in oats and arabinoxylan in wheat have been demonstrated to lower blood cholesterol and triglycerides levels as well as bile acid reabsorption.</li> <li>• Dietary fibre content and food structure of ingested wholegrain products can influence digestibility, transit time along gastrointestinal tract, gut microbial fermentability and SCFA production in large intestine.</li> <li>• Dietary fibres including resistant starch are recognised to play a role as prebiotics to nourish a diverse gut microbial community.</li> </ul> | <ul style="list-style-type: none"> <li>• Alkylresorcinols are metabolised to bioactive gut metabolites:               <ul style="list-style-type: none"> <li>- 3,5-dihydroxybenzoic acid (DHBA),</li> <li>- DHBA-glycine,</li> <li>- 3,5-dihydroxyphenylpropionic acid (DHPPA),</li> <li>- 5-(3,5-dihydroxyphenyl)pentanoic acid,</li> <li>- 3,5-dihydroxycinnamic acid (DHCA).</li> </ul> </li> <li>• 2,4-dihydroxy-1,4-benzoxazin-3-one (DIBOA) is a main benzoxazinoid metabolite.</li> <li>• Lignans (e.g., secoisolariciresinol) are metabolised by gut microbes into:               <ul style="list-style-type: none"> <li>- enterolignans,</li> <li>- enterodiol,</li> <li>- enterolactone</li> <li>- by <i>Eggerthella</i> and <i>Peptostreptococcus</i> (genus level) through benzyl ether reduction, guaicol demethylation, catechol, dihydroxylation and diol lactionisation reactions.</li> </ul> </li> <li>• A consortium of bacteria is required to metabolise secoisolariciresinol diglycoside to enterolactone by <i>Bacteroides</i>, <i>Clostridium</i>, <i>Butyribacterium</i>, <i>Methylotrophicum</i>, <i>Eubacterium</i>, <i>Blautia</i>, <i>Eggerthella</i>, <i>Factonifactor</i>, and <i>Longoviformis</i> (genus level).</li> <li>• Variability in plasma enterolactone level is reported to be affected by gut microbial composition, lignan intake, sex, age, BMI, and ethnicity.</li> </ul> | (Gunness et al., 2016; Hålldin et al., 2019; Landberg et al., 2019; Sanders et al., 2019; Cortés-Martín et al., 2020) |

|                                                                                                               |                                                                                                                                                                                                                                                                                                                                                                                                                                                                                                                                                                                                                                                                                                                                                                                                                                                                                                                                                                                                                 |                                                                                                                                                                                                                                                                                                                                                                                                                                                                                                                                                                                                                                                                                                                                                                                                                                                                                                                                                                                                                                                                                                                                                                                                                                                                                                                                                                                                                                                                                                                              |                                                                                                   |
|---------------------------------------------------------------------------------------------------------------|-----------------------------------------------------------------------------------------------------------------------------------------------------------------------------------------------------------------------------------------------------------------------------------------------------------------------------------------------------------------------------------------------------------------------------------------------------------------------------------------------------------------------------------------------------------------------------------------------------------------------------------------------------------------------------------------------------------------------------------------------------------------------------------------------------------------------------------------------------------------------------------------------------------------------------------------------------------------------------------------------------------------|------------------------------------------------------------------------------------------------------------------------------------------------------------------------------------------------------------------------------------------------------------------------------------------------------------------------------------------------------------------------------------------------------------------------------------------------------------------------------------------------------------------------------------------------------------------------------------------------------------------------------------------------------------------------------------------------------------------------------------------------------------------------------------------------------------------------------------------------------------------------------------------------------------------------------------------------------------------------------------------------------------------------------------------------------------------------------------------------------------------------------------------------------------------------------------------------------------------------------------------------------------------------------------------------------------------------------------------------------------------------------------------------------------------------------------------------------------------------------------------------------------------------------|---------------------------------------------------------------------------------------------------|
|                                                                                                               |                                                                                                                                                                                                                                                                                                                                                                                                                                                                                                                                                                                                                                                                                                                                                                                                                                                                                                                                                                                                                 | <ul style="list-style-type: none"> <li>• Vanillic acid, hydroxyhippuric acids, sulfated-conjugates of benzoic and ferulic acids as well as gut-microbial derived metabolites (DH-AVAs) have been characterised after consumption of oats.</li> <li>• <i>Ruminococcus</i> (genus level) is a keystone species for degradation of resistant starch.</li> <li>• Acetate and lactate are main metabolic end products of <i>Bifidobacteria</i> and lactic acid bacteria, and can be utilised by other microbes to produce propionate and butyrate (ecological network).</li> </ul>                                                                                                                                                                                                                                                                                                                                                                                                                                                                                                                                                                                                                                                                                                                                                                                                                                                                                                                                                |                                                                                                   |
| Ellagitannin-containing fruits and nuts (e.g., pomegranate, berries, grapes, walnuts, almonds, and hazelnuts) | <ul style="list-style-type: none"> <li>• Pomegranate, berries and nuts are seasonally available in Asian and European countries.</li> <li>• High inter-individual variability in gut/faecal microbial composition to produce urolithins.</li> <li>• Urolithin metabolites have been reported to predict human host responsiveness to a polyphenol-rich intervention.</li> <li>• Supplementation of 3,8-dihydroxy-urolithin (urolithin A) was reported to induce a molecular signature of improved mitochondrial and cellular health.</li> </ul>                                                                                                                                                                                                                                                                                                                                                                                                                                                                 | <ul style="list-style-type: none"> <li>• Ellagitannins, punicalagin and ellagic acid are metabolised to (hydroxy, dihydroxy and tetrahydroxy) urolithins by <i>Blautia</i>, <i>Bifidobacterium</i>, <i>Gordonibacter</i>, <i>Ellagibacter</i>, <i>Coprococcus</i>, and <i>Collinsella</i> (genus level) through lactone-ring cleavage, decarboxylation, and dihydroxylation reactions.</li> <li>• Individuals can be stratified into three metabolites: UM-A (25-80%), UM-B (10-50%), or UM-0 (5-25%) in various Spanish sub-populations.</li> <li>• Metabolite is dependent on age but not affected by health status, demographics, and amount/type of ellagitannins consumed.</li> </ul>                                                                                                                                                                                                                                                                                                                                                                                                                                                                                                                                                                                                                                                                                                                                                                                                                                   | (Tulipani et al., 2012; Espín et al., 2013; García-Mantrana et al., 2019)                         |
| Spices (e.g., chilli, curry, curcumin, turmeric) and extracts                                                 | <ul style="list-style-type: none"> <li>• Chilli and curry-based dishes are frequently consumed in Asian, Indian, Mexican, African, and Turkish diets, and less frequently in Caucasian and Western diets.</li> <li>• Chilli fruit itself is not completely digested and fermented in the gastrointestinal tract as small intact material are excreted in the faecal material, and considering the residence time (~14 hours) in the large intestine, further research could investigate the two-way interaction between chilli (and other spices) and gut bacteria.</li> <li>• Studies on spices including curcumin have shown promotion of beneficial bacteria such as <i>Bifidobacterium</i> and <i>Lactobacilli</i> (genus level) whilst reducing pathogenic strains such as <i>Coriobacteriales</i>, <i>Prevotella</i>, <i>Enterococci</i>, and <i>Enterobacteria</i> (genus level), suggesting a potential role in regulating intestinal microbiota and enhancement of gastrointestinal health.</li> </ul> | <ul style="list-style-type: none"> <li>• Capsaicin was reported to increase abundance of <i>Ruminococcaceae</i> and <i>Lachnospiraceae</i> (family level) that are associated with preventing high-fat diet induced gut barrier breakdown, and reduced lipopolysaccharide (LPS)-producing family <i>S24_7</i> that is linked to obesity.</li> <li>• Curcumin was shown to increase abundance of <i>Clostridium</i> spp., <i>Bacteroides</i> spp., <i>Citrobacter</i> spp., <i>Cronobacter</i> spp., <i>Enterobacter</i> spp., <i>Enterococcus</i> spp., <i>Klebsiella</i> spp., <i>Parabacteroides</i> spp., and <i>Pseudomonas</i> spp. (species level) but reduce <i>Blautia</i> spp. and <i>Ruminococcus</i> spp. (species level).</li> <li>• Curcumin is poorly bioavailable, which in turn, modulates homeostasis of gut-brain axis when metabolised by gut microbiota into: <ul style="list-style-type: none"> <li>- 1-(4-hydroxy-3-methoxyphenyl)-2-propanol,</li> <li>- dihydroferulic acid,</li> <li>- ferulic acid,</li> <li>- bisdemethylcurcumin.</li> <li>- demethylcurcumin,</li> <li>- dihydrocurcumin,</li> <li>- tetrahydrocurcumin</li> <li>- by <i>Scherichia fergusonii</i>, <i>Escherichia coli</i>, <i>Blautia</i> sp., <i>Bifidobacterium longum</i>, <i>Bifidobacterium pseudocatenulatum</i>, <i>Enterococcus faecalis</i>, <i>Lactobacillus acidophilus</i>, and <i>Lactobacillus casei</i> (species level) through reduction, demethylation, acetylation and hydroxylation</li> </ul> </li> </ul> | (Kang et al., 2017; Shen et al., 2017; Di Meo et al., 2019; Pluta et al., 2020; Low et al., 2021) |

|                                                                                                                       |                                                                                                                                                                                                                                                                                                                                                                                                                                                                                                                                                                                                                                                                                                                       |                                                                                                                                                                                                                                                                                                                                                                                                                                                                                                                                                                                                                                                                                                                                                                                                                                                                                                                                      |                                             |
|-----------------------------------------------------------------------------------------------------------------------|-----------------------------------------------------------------------------------------------------------------------------------------------------------------------------------------------------------------------------------------------------------------------------------------------------------------------------------------------------------------------------------------------------------------------------------------------------------------------------------------------------------------------------------------------------------------------------------------------------------------------------------------------------------------------------------------------------------------------|--------------------------------------------------------------------------------------------------------------------------------------------------------------------------------------------------------------------------------------------------------------------------------------------------------------------------------------------------------------------------------------------------------------------------------------------------------------------------------------------------------------------------------------------------------------------------------------------------------------------------------------------------------------------------------------------------------------------------------------------------------------------------------------------------------------------------------------------------------------------------------------------------------------------------------------|---------------------------------------------|
|                                                                                                                       |                                                                                                                                                                                                                                                                                                                                                                                                                                                                                                                                                                                                                                                                                                                       | <p>reactions, and NADPH-dependent curcumin/dihydrocurcumin reductase (CurA).</p> <ul style="list-style-type: none"> <li>- Black pepper, cayenne pepper, cinnamon, ginger, oregano, and rosemary were reported to enhance growth of <i>Bifidobacterium spp.</i> and <i>Lactobacillus spp.</i> (species level) but exhibit inhibitory activity against selected <i>Ruminococcus</i>, <i>Fusobacterium</i> and <i>Clostridium</i> (genus level).</li> </ul>                                                                                                                                                                                                                                                                                                                                                                                                                                                                             |                                             |
| <p>Traditional Chinese Medicine (TCM) (typically include herbs, seeds, roots, leaves, rhizomes, bark and flowers)</p> | <ul style="list-style-type: none"> <li>• As plant components, TCM or herbal medicines represent a complex mixture of phytonutrients, and have a long history in being used to alleviate symptoms, improve health and maintain homeostasis (e.g., immunity, gastrointestinal tract, brain function, eyesight) but their mechanisms are not clearly understood and validated.</li> <li>• TCM has also been suggested to alleviate chronic liver diseases, obesity and Type II Diabetes (T2D) via reported actions of modulating gut microbiota.</li> <li>• Saponins in <i>Polygonatum kingianum</i> (Solomon's seal) was reported to prevent the increase in fasting blood glucose levels and alleviate T2D.</li> </ul> | <ul style="list-style-type: none"> <li>• Berberine, an isoquinoline alkaloid in <i>Coptis chinensis</i> (Chinese goldthread plant) was associated with increased abundance of <i>Bacteroidetes</i>, <i>Bifidobacterium</i> and <i>Lactobacillus</i> (genus level).</li> <li>• Qushi Huayu Fang (mixture of 5 herbs: <i>Artemisia capillaries Thunb</i>, <i>Gardenia jasminoides Ellis</i>, <i>Fallopia Japonica</i>, <i>Curcuma longa L.</i> and <i>Hypericum Japonicum Thunb</i>) was associated with increased <i>Collinsella</i> (genus level) and SCFA production.</li> <li>• Extracts of red ginseng and <i>Semen Coicis</i> (Coix seed) was shown to enhance <i>in vitro</i> growth of known probiotics, <i>Bifidobacterium</i> and <i>Lactobacillus</i> (genus level).</li> <li>• Extract of red ginseng was also shown to inhibit growth of pathogenic strains and alleviate inflammatory bowel disease symptoms.</li> </ul> | <p>(Deng et al., 2012; Lu et al., 2019)</p> |
| <p>Stilbenes-containing beverages (e.g., red wine, grape juice)</p>                                                   | <ul style="list-style-type: none"> <li>• Red wine is more commonly consumed in European and Western diets, and less in Asia.</li> <li>• Drinking 1-2 glasses of red wine/week was shown to increase gut microbial <math>\alpha</math>-diversity in British women, Flemish and American populations.</li> <li>• Gut microbiota associated with red wine consumption has been linked to lower levels of HDL cholesterol.</li> </ul>                                                                                                                                                                                                                                                                                     | <ul style="list-style-type: none"> <li>• Stilbenes such as piceid and resveratrol are metabolised to gut-derived metabolites: <ul style="list-style-type: none"> <li>- dihydro-resveratrol,</li> <li>- lunularin,</li> <li>- 3,4'-dihydroxy-trans-stilbene</li> <li>- by <i>Coriobacteriaceae</i> (family level); <i>Bifidobacterium infantis</i>, <i>Lactobacillus acidophilus</i>, <i>Adlercreutzia equolifaciens</i>, <i>Slackia equolifaciens</i> (species level).</li> <li>- Resveratrol can be re-glycosylated in the gut to produce piceid.</li> </ul> </li> </ul>                                                                                                                                                                                                                                                                                                                                                            | <p>(Le Roy et al., 2020)</p>                |
